# Supplementary material
Source: PubMed Central journal article supplement (PMC4361183)
Supplement: NIHMS667857-supplement-supplement_1.pdf [file NIHMS667857-supplement-supplement_1.pdf]

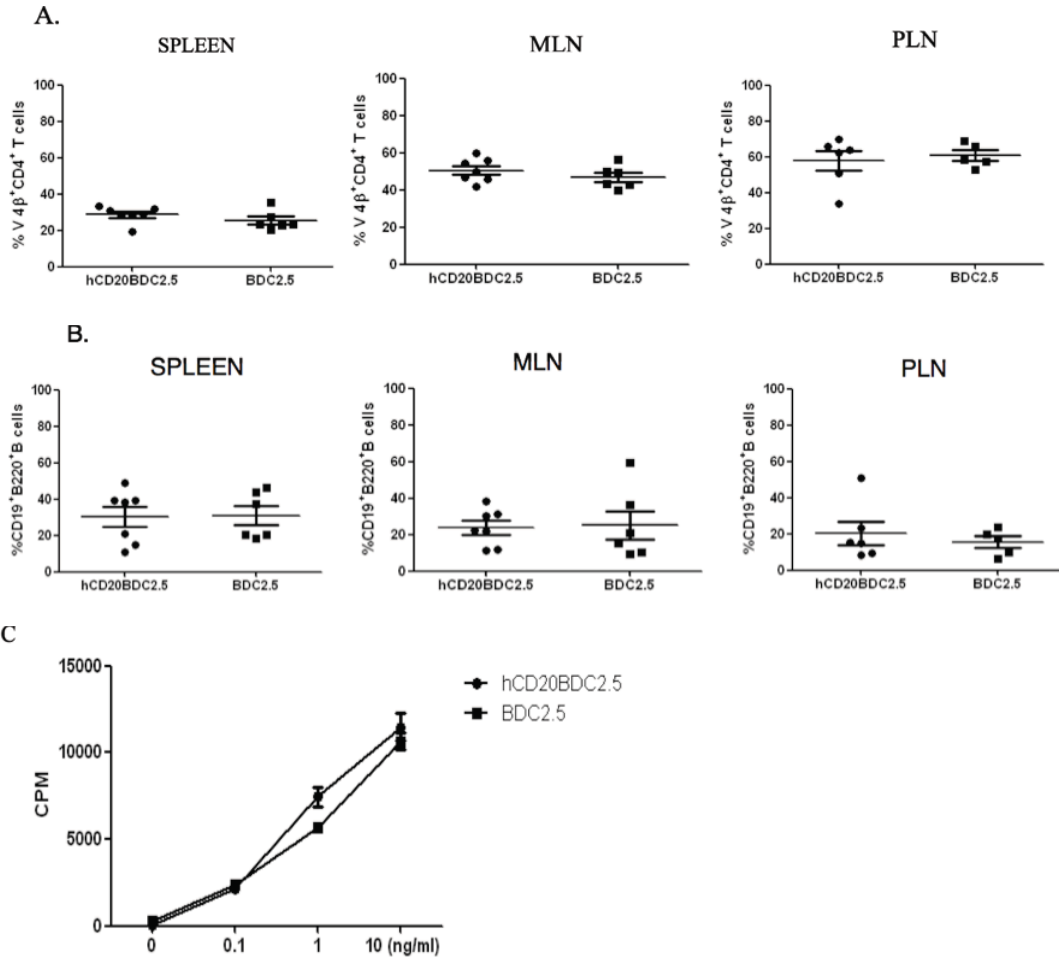

**Supplementary fig. 1** The expression of the hCD20 transgene does not change the phenotype and function of BDC2.5 T cells

- (A) Percentage of BDC2.5 T cells ( $V\beta 4^+CD4^+$ ) in the total lymphocytes of different lymphoid organs.  $n=6\sim 7$  per group, in both male and female mice.  $P>0.05$  for all.
- (B) Percentage of B cells ( $CD19^+B220^+$ ) in the total lymphocytes of different lymphoid organs.  $n=6$  per group, in both male and female mice.  $P>0.05$  for all.
- (C) Function of BDC2.5 T cells. Response of BDC2.5 T cells isolated from either hCD20BDC2.5 NOD or BDC2.5 NOD mice to antigen stimulation. The proliferative response was presented as 3H-thymidine incorporation (cpm).  $P>0.05$  for all. The experiment was performed twice in both male and female mice.
